# Supplementary material for: Performance Evaluation of an Automated Peritoneal Dialysis Solution Generation System in Patients Using Automated Peritoneal Dialysis
Source: PubMed Central journal article supplement — Kidney Int Rep. 2024 Mar 18;9(6):1752–7. doi: 10.1016/j.ekir.2024.03.010 (PMC11184249; doi:10.1016/j.ekir.2024.03.010), 2024-03-18
Supplement: mmc1.pdf [file mmc1.pdf]

## Methods:

### *Inclusion Criteria*

Each patient had to meet the following criteria to be eligible for the study:

1. Patient was 18 years or older.
2. Patient with ESRD receiving PD therapy, and who was already trained and regularly using the AMIA or HomeChoice APD Cycler with Dianeal PD Solution for at least 12 weeks.
3. Patient was receiving or was willing and able to use Dianeal Low Calcium (2.5 mEq/L) PD prescriptive regimen at study treatment initiation per Investigator's assessment.
4. Patient demonstrated adequate PD therapy with clinical euvolemia as assessed by the Investigator with a total Kt/Vurea of a minimum of 1.7 within 45 days of Screening, or as measured at Screening. If a total Kt/Vurea was not available within 45 days of Screening, it was measured at Screening.
5. Investigator assessed that, with appropriate training, the patient was able to successfully manage his/her dialysis treatment with the SGS.
6. Patient was available and was willing to complete training on the SGS .
7. Patient and home environment were deemed suitable for treatment with the SGS, while in the home.
8. Home electrical and water assessments met the suitability criteria for the SGS.
9. The patient's home had a suitable wireless connection or patient was willing to allow installation of a suitable wireless connection.
10. Patient and/or care partner (if participating) was able to read and understand English and provide informed consent after an explanation of the proposed study. If the patient could not read and understand English, patient could still participate if he/she had a co-residing care partner who could read and understand English, assessed as adequate by the PI.
11. Women of childbearing potential (not menopausal or surgically sterile) could not be pregnant. Serum qualitative and quantitative pregnancy tests were done within 14 days prior to initiation of the study.
  - If qualitative serum  $\beta$ -hCG test results were positive, quantitative serum pregnancy test was repeated in 48 hours.
  - If quantitative serum  $\beta$ -hCG levels showed clinically significant rise within 48 hours, serum progesterone levels were taken. Serum progesterone > 5 ng/mL excluded a patient from the study.
12. Sexually active males and females had to agree to use a reliable means of contraception during the study and for 30 days afterwards (e.g., oral contraceptive and condom, intrauterine device and condom, or diaphragm with spermicide and condom).

### *Exclusion Criteria*

Patients who met any of the following criteria were excluded from the study:

1. Patients with a history of PD catheter dysfunction within 12 weeks prior to study enrolment, as evaluated by the Investigator.
2. Patients who had episodes of peritonitis or exit site infection within 12 weeks prior to study enrolment.
3. Patients who had signs of impending or current infection, including a cloudy dialysis effluent or a dialysis white cell count  $> 100 \mu\text{L}$  or  $> 0.1 \times 10^9/\text{L}$  (after a dwell time of at least 2 hours), with  $> 50\%$  polymorphonuclear cells (PMNs), and/or positive dialysis effluent culture.
4. Patients who had a severe primary immune deficiency or other condition that may have masked clinical signs of peritonitis, as evaluated by the Investigator.
5. Patients with a history of repeated non-compliance with PD, therapy (e.g., a substantial number of missed clinic visits, missed treatments, or a history of mismanagement of diet or medications), as evaluated by the Investigator.
6. Patients who had acute renal failure with the chance of recovery.
7. Patients who were pre-scheduled for a living donor kidney transplant within the following 6 months.
8. Patients who were not expected to live at least 6 months while maintaining PD treatment.
9. Patients who had major abdominal surgery within 6 months prior to study enrolment.
10. Patients who had a current abdominal hernia, as evaluated by the Investigator.
11. Patients with advanced liver or pulmonary disease, as evaluated by the Investigator.
12. Patients with a positive serology test result for Hepatitis B Virus or Hepatitis C Virus infection, or aspartate transaminase or alanine aminotransferase  $> 3 \times$  the upper limit of normal at Screening.<sup>7</sup>
13. Patients with diagnosed stage III or IV New York Heart Association (NYHA) heart failure.
14. Patients who had an active malignancy. (Cancers determined to be cured or in remission for  $\geq 1$  year, curatively resected basal cell or squamous skin cell cancers, cervical cancer in situ, or resected colonic polyps were acceptable diagnosis).
15. Patients with a history of a clinically significant illness and/or clinically significant surgery within the previous 14 days preceding the Screening Visit, as determined by the Investigator.
16. Patients who were enrolled in another interventional clinical study.

There were 12 sites for the study which included- University of Mississippi Medical Center, Mississippi; Mayo Clinic- Jacksonville, Florida; Mount Sinai Hospital- New York, NY; The Rogosin Institute- New York, NY; Medical District Home Dialysis, LLC, Illinois; St. Bernards Medical Center, Arkansas; Scott & White Memorial Hospital (Baylor-Temple), Texas; Satellite WellBound San Mateo, California; University of

Michigan, Michigan; Satellite WellBound San Jose, California; Satellite WellBound Mountain View, California; and Desoto Regional Dialysis Center, LLC (ARA), Texas. Prior to the start of the study, IRB approvals were received from all central and local IRBs as appropriate for the various participating institutions and clinics. Three sites used local IRBs, and the remainder used a central IRB (Baylor Scott & White: #019-127; Mayo Clinic: #18-010824; Mount Sinai Hospital: IRB-MSH#19-10; and Advarra: Pro00029241).

During the Screening Period, all consenting patients had a home assessment, including feed (tap) water analysis, to confirm their home environment was suitable for this study. Data was collected throughout the duration of the 12 week study period, including the Screening Period, Baseline Period (In-center Training Period), Study Treatment Period, Follow-up Period, and the End-of-Study Visit/Early Termination Visit. All AEs (not reported as medical history), product complaints (PCs), and device deficiencies (DDs) observed by the study personnel or reported by the patient during the course of the study were documented from the time of signing the Informed consent form through the End-of-Study/Early Termination Visit. The PI or designee (e.g., sub-Investigator) assessed each patient at the Screening Visit and on a weekly basis, according to standard of care, which included evaluation of blood pressure (BP), pulse rate, weight, fluid status, and dialysis prescription. Laboratory data was collected at Screening and during the use of the AMIA APD Solution Generation System.

#### Statistical Methods:

The Study was based on the Intent-to-Treat principle and included all patients who received at least one treatment with the AMIA APD Solution Generation System and who had at least one measurement for the primary endpoint. A formal sample size calculation was not performed. Up to 50 patients were planned to be enrolled such that a total target of 30 evaluable patients were to complete the 12-week Study Treatment Period and the Follow-up Period.

The chemical composition of the final dialysis solution produced by the AMIA APD Solution Generation System, during simulated treatment at visits 1, 2, 3, and 4, was tested and compared to the specifications of Baxter's approved Dianeal Low Calcium (2.5 mEq/L) PD Solution. PD adequacy was measured by sample collection and calculation of Total Kt/Vurea (dialysate Kt/Vurea plus renal Kt/Vurea) occurring one time during Week 5, 6, 7, or 8 of the Study Treatment Period.

Product water from the WD was collected at Visits 1, 2, 3, and 4 and tested for microbiological (including endotoxin) contamination per ISO standard. Microbiological Testing of the Product Water from the Holding Bag was collected at Visits 1, 2, 3, and 4 and tested for microbiological contamination and endotoxin levels per ISO standards.

The safety profile of the AMIA APD SGS was assessed by collecting AEs, SAEs, ADEs, SADEs, incidence of device alarms, and vital signs. Adverse events and SAEs were to be collected from the time of signing informed consent throughout the Study Treatment Period and during the follow-up period of 5 to 10 days after the last study treatment. Vital signs were to be recorded on the electronic case report form at Screening, Study Visit 2, Study Visit 3, Study Visit 4, and at the End-of-Study Visit.

Table S1: Demographics and baseline characteristics of enrolled patients

| Characteristics                      | Category/Value                      | Total (N=22)<br>n (%) |
|--------------------------------------|-------------------------------------|-----------------------|
| Sex                                  | Female                              | 14 (63.6)             |
|                                      | Male                                | 8 (36.4)              |
| Race                                 | Asian                               | 5 (22.7)              |
|                                      | Black or African American           | 7 (31.8)              |
|                                      | White                               | 9 (40.9)              |
|                                      | Other                               | 1 (4.5)               |
| Ethnic Group                         | Hispanic or Latino                  | 2 (9.1)               |
|                                      | Not Hispanic or Latino              | 20 (90.9)             |
| Primary Renal Diagnosis Etiology     | Diabetic Nephropathy                | 8 (36.4)              |
|                                      | Hypertensive Nephropathy            | 4 (18.2)              |
|                                      | Glomerulonephritis                  | 1 (4.5)               |
|                                      | Obstructive Uropathy                | 1 (4.5)               |
|                                      | Polycystic Kidney Disease           | 1 (4.5)               |
|                                      | Autoimmune Disease (includes lupus) | 2 (9.1)               |
|                                      | Immunoglobulin A (IgA)              | 1 (4.5)               |
|                                      | Other                               | 4 (18.2)              |
| Did the patient have a care partner? | No                                  | 15 (68.2)             |
|                                      | Yes                                 | 7 (31.8)              |

Table S2: Composition of Amia APD generated solutions

| Component | 1.5% Dextrose | 2.5% Dextrose | 4.25% Dextrose |
|-----------|---------------|---------------|----------------|
| Dextrose  | 75.5          | 126           | 214            |
| Sodium    | 132           | 132           | 132            |
| Calcium   | 1.25          | 1.25          | 1.25           |
| Magnesium | 0.25          | 0.25          | 0.25           |
| Chloride  | 95            | 95            | 95             |
| Lactate   | 40            | 40            | 40             |
| pH        | ~ 6           | ~ 6           | ~ 6            |

Table S3: Individual Parameter Testing of the Chemical Composition of the Dialysis Solution

| Parameter                                 | Total Tests <sup>1</sup> | Mean (SD)      | Median | Min, Max     |
|-------------------------------------------|--------------------------|----------------|--------|--------------|
| CaCl <sub>2</sub> 2H <sub>2</sub> O (g/L) | 69                       | 0.185 (0.0044) | 0.184  | 0.178, 0.207 |
| Chloride (g/L)                            | 69                       | 5.535 (0.0240) | 5.540  | 5.48, 5.6    |
| MgCl <sub>2</sub> 6H <sub>2</sub> O (g/L) | 69                       | 0.052 (0.0008) | 0.052  | 0.049, 0.054 |
| pH at 25°C                                | 69                       | 6.23 (0.122)   | 6.20   | 6, 6.5       |
| Sodium Lactate (g/L)                      | 69                       | 4.458 (0.0407) | 4.450  | 4.39, 4.56   |
| 5-HMF                                     | 67                       | 0.024 (0.0153) | 0.020  | 0.02, 0.14   |
| Color                                     | 67                       | 4.0 (1.67)     | 4.0    | 0, 7         |
| Sodium (mEq/L)                            | 67                       | 131.5 (1.55)   | 131.0  | 128, 136     |
| Dextrose Hydrous Assay                    | 66                       | 2.376 (1.0822) | 1.540  | 1.5, 4.3     |

5-HMF = 5-hydroxymethylfurfural; CaCl<sub>2</sub> 2H<sub>2</sub>O = calcium chloride dihydrate; max = maximum; MgCl<sub>2</sub> 6H<sub>2</sub>O = magnesium chloride hexahydrate; min = minimum; SD = standard deviation

<sup>1</sup> The total number of tests excludes those tests with a missing result

Table S4: Individual Parameter Summary of Microbiological and Chemical Testing of the Product Water from the Water Device

| Parameter (unit)  | Total Tests <sup>1</sup> | Mean (SD)       | Median | Min, Max         |
|-------------------|--------------------------|-----------------|--------|------------------|
| Endotoxin (EU/mL) | 68                       | 0.026 (0.0648)  | 0.010  | 0.005, 0.45      |
| TAMC (CFU/mL)     | 63                       | 1.7 (4.26)      | 0.0    | 0, 28            |
| TYMC (CFU/mL)     | 63                       | 0.8 (2.58)      | 0.0    | 0, 18            |
| Fluoride (g/mL)   | 51                       | 0.059 (0.0774)  | 0.034  | 0.034, 0.48      |
| Aluminum (g/mL)   | 53                       | 0.007 (0.0015)  | 0.007  | 0.0072, 0.018    |
| Cadmium (g/mL)    | 53                       | 0.000 (0.0004)  | 0.000  | 0.00012, 0.0019  |
| Chlorine (g/mL)   | 53                       | 0.101 (0.0041)  | 0.100  | 0.1, 0.13        |
| Cobalt (g/mL)     | 53                       | 0.001 (0.0009)  | 0.001  | 0.0005, 0.0046   |
| Sodium (g/mL)     | 53                       | 4.566 (11.7888) | 1.700  | 0.59, 71.6       |
| Antimony (g/mL)   | 53                       | 0.001 (0.0000)  | 0.001  | 0.0005, 0.00057  |
| Arsenic (g/mL)    | 53                       | 0.001 (0.0001)  | 0.001  | 0.0005, 0.001    |
| Barium (g/mL)     | 53                       | 0.001 (0.0008)  | 0.001  | 0.0005, 0.0037   |
| Beryllium (g/mL)  | 53                       | 0.000 (0.00)    | 0.000  | 0.00007, 0.00008 |
| Calcium (g/mL)    | 53                       | 0.218 (0.1110)  | 0.200  | 0.2, 1           |
| Chromium (g/mL)   | 53                       | 0.001 (0.0002)  | 0.001  | 0.0005, 0.0016   |
| Copper (g/mL)     | 53                       | 0.002 (0.0093)  | 0.001  | 0.00093, 0.069   |
| Lead (g/mL)       | 53                       | 0.001 (0.0000)  | 0.001  | 0.00064, 0.00072 |
| Magnesium (g/mL)  | 53                       | 0.166 (0.0342)  | 0.160  | 0.16, 0.39       |
| Mercury (g/mL)    | 53                       | 0.000 (0.0000)  | 0.000  | 0.0001, 0.0001   |
| Nickel (g/mL)     | 53                       | 0.001 (0.0007)  | 0.001  | 0.00062, 0.0039  |
| Nitrate (g/mL)    | 53                       | 0.029 (0.0241)  | 0.025  | 0.025, 0.2       |
| Potassium (g/mL)  | 53                       | 0.274 (0.0275)  | 0.270  | 0.27, 0.47       |
| Selenium (g/mL)   | 53                       | 0.001 (0.0000)  | 0.001  | 0.00083, 0.00094 |
| Silver (g/mL)     | 53                       | 0.000 (0.0007)  | 0.000  | 0.00005, 0.003   |
| Sulfate (g/mL)    | 53                       | 2.50 (0.000)    | 2.50   | 2.5, 2.5         |
| Thallium (g/mL)   | 53                       | 0.001 (0.0000)  | 0.001  | 0.0005, 0.00057  |
| Zinc (g/mL)       | 53                       | 0.007 (0.0055)  | 0.004  | 0.0043, 0.031    |

Max = maximum; min = minimum; SD = standard deviation

<sup>1</sup> The total number of tests excludes those tests with a missing result

Table S5: Secondary efficacy Endpoint: Total Kt/Vurea Summary

| Visit                               | Variable         | Test Values  | Change from Baseline |
|-------------------------------------|------------------|--------------|----------------------|
| Screening Visit<br>(Baseline Value) | N                | 26           | N/A                  |
|                                     | Mean (SD)        | 2.42 (0.630) |                      |
|                                     | Median           | 2.25         |                      |
|                                     | Minimum, Maximum | 1.7, 3.9     |                      |
| Total Kt/V <sub>urea</sub><br>Visit | N                | 15           | 15                   |
|                                     | Mean (SD)        | 2.13 (0.439) | -0.15 (0.370)        |
|                                     | Median           | 2.10         | -0.10                |
|                                     | Minimum, Maximum | 1.5, 3.2     | -1, 0.3              |

N/A = not applicable; SD = standard deviation  
n = number of results available

Table S6: Summary of Device Deficiency Characteristics

| Characteristics <sup>1</sup>                           | Category                                | N <sup>o</sup> . of Patients n (%) <sup>2</sup> | N <sup>o</sup> . of Events n (%) <sup>3</sup> | N <sup>o</sup> . of Events per Total Device Days |
|--------------------------------------------------------|-----------------------------------------|-------------------------------------------------|-----------------------------------------------|--------------------------------------------------|
| Total DDs                                              |                                         | 20                                              | 96                                            |                                                  |
| Product                                                | Amia APD Cycler (PoC Version)           | 14 (70.0)                                       | 23 (24.0)                                     | 0.0112                                           |
|                                                        | Amia APD Solution Generation System Set | 5 (25.0)                                        | 6 (6.3)                                       | 0.0029                                           |
|                                                        | Water Device                            | 13 (65.0)                                       | 35 (36.5)                                     | 0.0170                                           |
|                                                        | Sharesource Connectivity Platform       | 1 (5.0)                                         | 1 (1.0)                                       | 0.0005                                           |
|                                                        | Filter Pack                             | 1 (5.0)                                         | 2 (2.1)                                       | 0.0010                                           |
|                                                        | 1L Dextrose Concentrate                 | 1 (5.0)                                         | 1 (1.0)                                       | 0.0005                                           |
|                                                        | 1L Electrolyte Concentrate              | 3 (15.0)                                        | 4 (4.2)                                       | 0.0019                                           |
|                                                        | Universal Ion Exchanger USM-818         | 3 (15.0)                                        | 3 (3.1)                                       | 0.0015                                           |
|                                                        | WIFI Bridge                             | 3 (15.0)                                        | 4 (4.2)                                       | 0.0019                                           |
|                                                        | Water Softener                          | 5 (25.0)                                        | 8 (8.3)                                       | 0.0039                                           |
|                                                        | Other                                   | 7 (35.0)                                        | 9 (9.4)                                       | 0.0044                                           |
| Type of DD                                             | Product issue/Device Failure            | 11 (55.0)                                       | 23 (24.0)                                     | 0.0112                                           |
|                                                        | Product issue/Device Malfunction        | 19 (95.0)                                       | 73 (76.0)                                     | 0.0355                                           |
| Occurrence of DD                                       | Before Treatment                        | 19 (95.0)                                       | 54 (56.3)                                     | 0.0263                                           |
|                                                        | During Treatment                        | 11 (55.0)                                       | 25 (26.0)                                     | 0.0122                                           |
|                                                        | After Treatment                         | 9 (45.0)                                        | 17 (17.7)                                     | 0.0083                                           |
| Did the device give an alert, alarm, or error message? | No                                      | 15 (75.0)                                       | 36 (37.5)                                     |                                                  |
|                                                        | Alarm                                   | 6 (30.0)                                        | 14 (14.6)                                     | 0.0068                                           |
|                                                        | Alert                                   | 11 (55.0)                                       | 19 (19.8)                                     | 0.0093                                           |
|                                                        | Error message                           | 11 (55.0)                                       | 27 (28.1)                                     | 0.0131                                           |
| Was there a safety concern?                            | No                                      | 16 (80.0)                                       | 91 (94.8)                                     |                                                  |
|                                                        | Yes                                     | 4 (20.0)                                        | 5 (5.2)                                       | 0.0024                                           |
| Did the DD result in an AE/SUSAR/UADE?                 | No                                      | 20 (100.0)                                      | 96 (100.0)                                    |                                                  |

AE = adverse event; DD = device deficiency; SUSAR = suspected unexpected serious adverse reaction; UADE = unexpected adverse device effect

<sup>1</sup> Number of patients is the number of patients with at least one event in that particular category

<sup>2</sup> Percentage in the patients column is based on the number of patients with at least 1 DD

<sup>3</sup> Percentage in the events column is the percentage of overall events



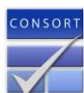

## CONSORT 2010 checklist of information to include when reporting a pilot or feasibility trial\*

| Section/Topic             | Item No | Checklist item                                                                                                                                      | Reported on page No                                                                                               |
|---------------------------|---------|-----------------------------------------------------------------------------------------------------------------------------------------------------|-------------------------------------------------------------------------------------------------------------------|
| <b>Title and abstract</b> |         |                                                                                                                                                     |                                                                                                                   |
|                           | 1a      | Identification as a pilot or feasibility randomised trial in the title                                                                              | Feasibility discussed in main text as a “proof of concept”, can be added to title at reviewers/editors discretion |
|                           | 1b      | Structured summary of pilot trial design, methods, results, and conclusions (for specific guidance see CONSORT abstract extension for pilot trials) | 2                                                                                                                 |
| <b>Introduction</b>       |         |                                                                                                                                                     |                                                                                                                   |
| Background and objectives | 2a      | Scientific background and explanation of rationale for future definitive trial, and reasons for randomised pilot trial                              | 3, 8                                                                                                              |
|                           | 2b      | Specific objectives or research questions for pilot trial                                                                                           | 4                                                                                                                 |
| <b>Methods</b>            |         |                                                                                                                                                     |                                                                                                                   |
| Trial design              | 3a      | Description of pilot trial design (such as parallel, factorial) including allocation ratio                                                          | 4                                                                                                                 |
|                           | 3b      | Important changes to methods after pilot trial commencement (such as eligibility criteria), with reasons                                            | N/A (no important changes)                                                                                        |
| Participants              | 4a      | Eligibility criteria for participants                                                                                                               | Supplementary File                                                                                                |
|                           | 4b      | Settings and locations where the data were collected                                                                                                | 4, 5                                                                                                              |
|                           | 4c      | How participants were identified and consented                                                                                                      | Supplementary File                                                                                                |
| Interventions             | 5       | The interventions for each group with sufficient details to allow replication, including how and when they were actually administered               | N/A (technical feasibility of prototype development, not available to the public)                                 |

|                                                      |     |                                                                                                                                                                                             |                               |
|------------------------------------------------------|-----|---------------------------------------------------------------------------------------------------------------------------------------------------------------------------------------------|-------------------------------|
| Outcomes                                             | 6a  | Completely defined prespecified assessments or measurements to address each pilot trial objective specified in 2b, including how and when they were assessed                                | Supplementary File            |
|                                                      | 6b  | Any changes to pilot trial assessments or measurements after the pilot trial commenced, with reasons                                                                                        | N/A (no important changes)    |
|                                                      | 6c  | If applicable, prespecified criteria used to judge whether, or how, to proceed with future definitive trial                                                                                 |                               |
| Sample size                                          | 7a  | Rationale for numbers in the pilot trial                                                                                                                                                    | N/A, intervention development |
|                                                      | 7b  | When applicable, explanation of any interim analyses and stopping guidelines                                                                                                                | N/A, none                     |
| Randomisation:                                       |     |                                                                                                                                                                                             |                               |
| Sequence generation                                  | 8a  | Method used to generate the random allocation sequence                                                                                                                                      | N/A, non-randomized study     |
|                                                      | 8b  | Type of randomisation(s); details of any restriction (such as blocking and block size)                                                                                                      | N/A, non-randomized study     |
| Allocation concealment mechanism                     | 9   | Mechanism used to implement the random allocation sequence (such as sequentially numbered containers), describing any steps taken to conceal the sequence until interventions were assigned | N/A, non-randomized study     |
| Implementation                                       | 10  | Who generated the random allocation sequence, who enrolled participants, and who assigned participants to interventions                                                                     | N/A, non-randomized study     |
| Blinding                                             | 11a | If done, who was blinded after assignment to interventions (for example, participants, care providers, those assessing outcomes) and how                                                    | N/A, open-label study         |
|                                                      | 11b | If relevant, description of the similarity of interventions                                                                                                                                 | N/A, single-arm study         |
| Statistical methods                                  | 12  | Methods used to address each pilot trial objective whether qualitative or quantitative                                                                                                      | Supplementary File            |
| <b>Results</b>                                       |     |                                                                                                                                                                                             |                               |
| Participant flow (a diagram is strongly recommended) | 13a | For each group, the numbers of participants who were approached and/or assessed for eligibility, randomly assigned, received intended treatment, and were assessed for each objective       | Supplementary File, Figure 2  |
|                                                      | 13b | For each group, losses and exclusions after randomisation, together with reasons                                                                                                            | 5                             |
| Recruitment                                          | 14a | Dates defining the periods of recruitment and follow-up                                                                                                                                     | Added to 5                    |
|                                                      | 14b | Why the pilot trial ended or was stopped                                                                                                                                                    | 5                             |

|                          |     |                                                                                                                                                                                |                                                                                                                                   |
|--------------------------|-----|--------------------------------------------------------------------------------------------------------------------------------------------------------------------------------|-----------------------------------------------------------------------------------------------------------------------------------|
| Baseline data            | 15  | A table showing baseline demographic and clinical characteristics for each group                                                                                               | Supplementary File (Table S1)                                                                                                     |
| Numbers analysed         | 16  | For each objective, number of participants (denominator) included in each analysis. If relevant, these numbers should be by randomised group                                   | 5, 6, Supplementary File                                                                                                          |
| Outcomes and estimation  | 17  | For each objective, results including expressions of uncertainty (such as 95% confidence interval) for any estimates. If relevant, these results should be by randomised group | 5, 6, Supplementary File                                                                                                          |
| Ancillary analyses       | 18  | Results of any other analyses performed that could be used to inform the future definitive trial                                                                               | N/A                                                                                                                               |
| Harms                    | 19  | All important harms or unintended effects in each group (for specific guidance see CONSORT for harms)                                                                          | 6, Supplementary File                                                                                                             |
|                          | 19a | If relevant, other important unintended consequences                                                                                                                           | N/A                                                                                                                               |
| <b>Discussion</b>        |     |                                                                                                                                                                                |                                                                                                                                   |
| Limitations              | 20  | Pilot trial limitations, addressing sources of potential bias and remaining uncertainty about feasibility                                                                      | 7                                                                                                                                 |
| Generalisability         | 21  | Generalisability (applicability) of pilot trial methods and findings to future definitive trial and other studies                                                              | 7                                                                                                                                 |
| Interpretation           | 22  | Interpretation consistent with pilot trial objectives and findings, balancing potential benefits and harms, and considering other relevant evidence                            | 7                                                                                                                                 |
|                          | 22a | Implications for progression from pilot to future definitive trial, including any proposed amendments                                                                          | 8                                                                                                                                 |
| <b>Other information</b> |     |                                                                                                                                                                                |                                                                                                                                   |
| Registration             | 23  | Registration number for pilot trial and name of trial registry                                                                                                                 | N/A, device feasibility study/investigational new drug; Registered with US FDA IND#141130 (not a trial registry), added to page 4 |
| Protocol                 | 24  | Where the pilot trial protocol can be accessed, if available                                                                                                                   | N/A, not separately published                                                                                                     |
| Funding                  | 25  | Sources of funding and other support (such as supply of drugs), role of funders                                                                                                | Addressed in COI Disclosures                                                                                                      |

|  |    |                                                                                            |                                                                          |
|--|----|--------------------------------------------------------------------------------------------|--------------------------------------------------------------------------|
|  | 26 | Ethical approval or approval by research review committee, confirmed with reference number | Added IRB approval language to page 4, TBD-need the IRB approval numbers |
|--|----|--------------------------------------------------------------------------------------------|--------------------------------------------------------------------------|

Citation: Eldridge SM, Chan CL, Campbell MJ, Bond CM, Hopewell S, Thabane L, et al. CONSORT 2010 statement: extension to randomised pilot and feasibility trials. *BMJ*. 2016;355. This is an Open Access article distributed in accordance with the terms of the Creative Commons Attribution (CC BY 3.0) license (<http://creativecommons.org/licenses/by/3.0/>), which permits others to distribute, remix, adapt and build upon this work, for commercial use, provided the original work is properly cited.

\*We strongly recommend reading this statement in conjunction with the CONSORT 2010, extension to randomised pilot and feasibility trials, Explanation and Elaboration for important clarifications on all the items. If relevant, we also recommend reading CONSORT extensions for cluster randomised trials, non-inferiority and equivalence trials, non-pharmacological treatments, herbal interventions, and pragmatic trials. Additional extensions are forthcoming: for those and for up-to-date references relevant to this checklist, see [www.consort-statement.org](http://www.consort-statement.org).
